# Supplementary material for: Different Responses of Soil Bacterial and Fungal Communities in Three Typical Vegetations following Nitrogen Deposition in an Arid Desert
Source: MDPI journal article supplement (doi:10.3390/microorganisms11102471), 2023-10-01
Supplement: s1 [file s1]

**Table S1** Mantel test analysis between community composition of soil bacteria and fungi and soil physicochemical properties in three plant communities.

|          | Variable                        | <i>A. sparsifolia</i> |              | <i>K. caspia</i> |              | Mixing       |              |
|----------|---------------------------------|-----------------------|--------------|------------------|--------------|--------------|--------------|
|          |                                 | Statistic             | Signif       | Statistic        | Signif       | Statistic    | Signif       |
| Bacteria | SOC                             | −0.092                | 0.695        | −0.079           | 0.701        | 0.136        | 0.168        |
|          | pH                              | −0.226                | 0.964        | −0.117           | 0.802        | <b>0.308</b> | <b>0.011</b> |
|          | AP                              | −0.086                | 0.712        | −0.154           | 0.863        | 0.212        | 0.095        |
|          | AK                              | 0.172                 | 0.108        | −0.074           | 0.629        | <b>0.329</b> | <b>0.024</b> |
|          | TN                              | −0.120                | 0.751        | 0.271            | 0.072        | −0.104       | 0.721        |
|          | NO <sub>3</sub> <sup>−</sup> –N | 0.271                 | 0.071        | −0.119           | 0.710        | <b>0.331</b> | <b>0.014</b> |
|          | NH <sub>4</sub> <sup>+</sup> –N | 0.147                 | 0.234        | 0.038            | 0.315        | 0.171        | 0.117        |
|          | AN                              | 0.067                 | 0.378        | −0.072           | 0.591        | 0.184        | 0.061        |
| Fungi    | SOC                             | −0.082                | 0.687        | 0.057            | 0.301        | −0.028       | 0.558        |
|          | pH                              | −0.088                | 0.715        | 0.154            | 0.138        | 0.082        | 0.247        |
|          | AP                              | 0.182                 | 0.092        | −0.014           | 0.485        | 0.145        | 0.201        |
|          | AK                              | 0.134                 | 0.181        | −0.151           | 0.815        | 0.205        | 0.140        |
|          | TN                              | 0.078                 | 0.297        | <b>0.254</b>     | <b>0.047</b> | −0.302       | 0.944        |
|          | NO <sub>3</sub> <sup>−</sup> –N | 0.260                 | 0.090        | −0.119           | 0.740        | −0.010       | 0.528        |
|          | NH <sub>4</sub> <sup>+</sup> –N | <b>0.497</b>          | <b>0.009</b> | 0.136            | 0.211        | 0.109        | 0.251        |
|          | AN                              | 0.078                 | 0.321        | −0.074           | 0.645        | −0.001       | 0.500        |

**Note:** SOC, soil organic carbon; AP, available phosphorous; AK, available potassium; TN, total nitrogen;  $\text{NO}_3^-$ -N, nitrate;  $\text{NH}_4^+$ -N, ammonium; AN, available nitrogen. This result was conducted with 999 permutations.

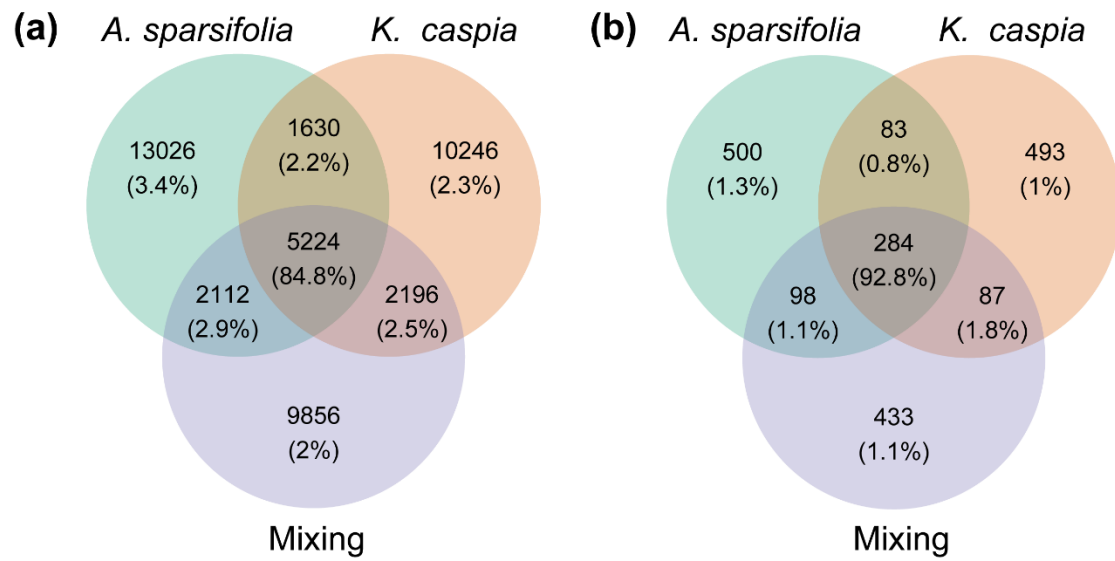

**Fig. S1** Venn diagram shows the number (percentage) bacterial **(a)** and fungal **(b)** ASVs specific to and common to the three plant community types.

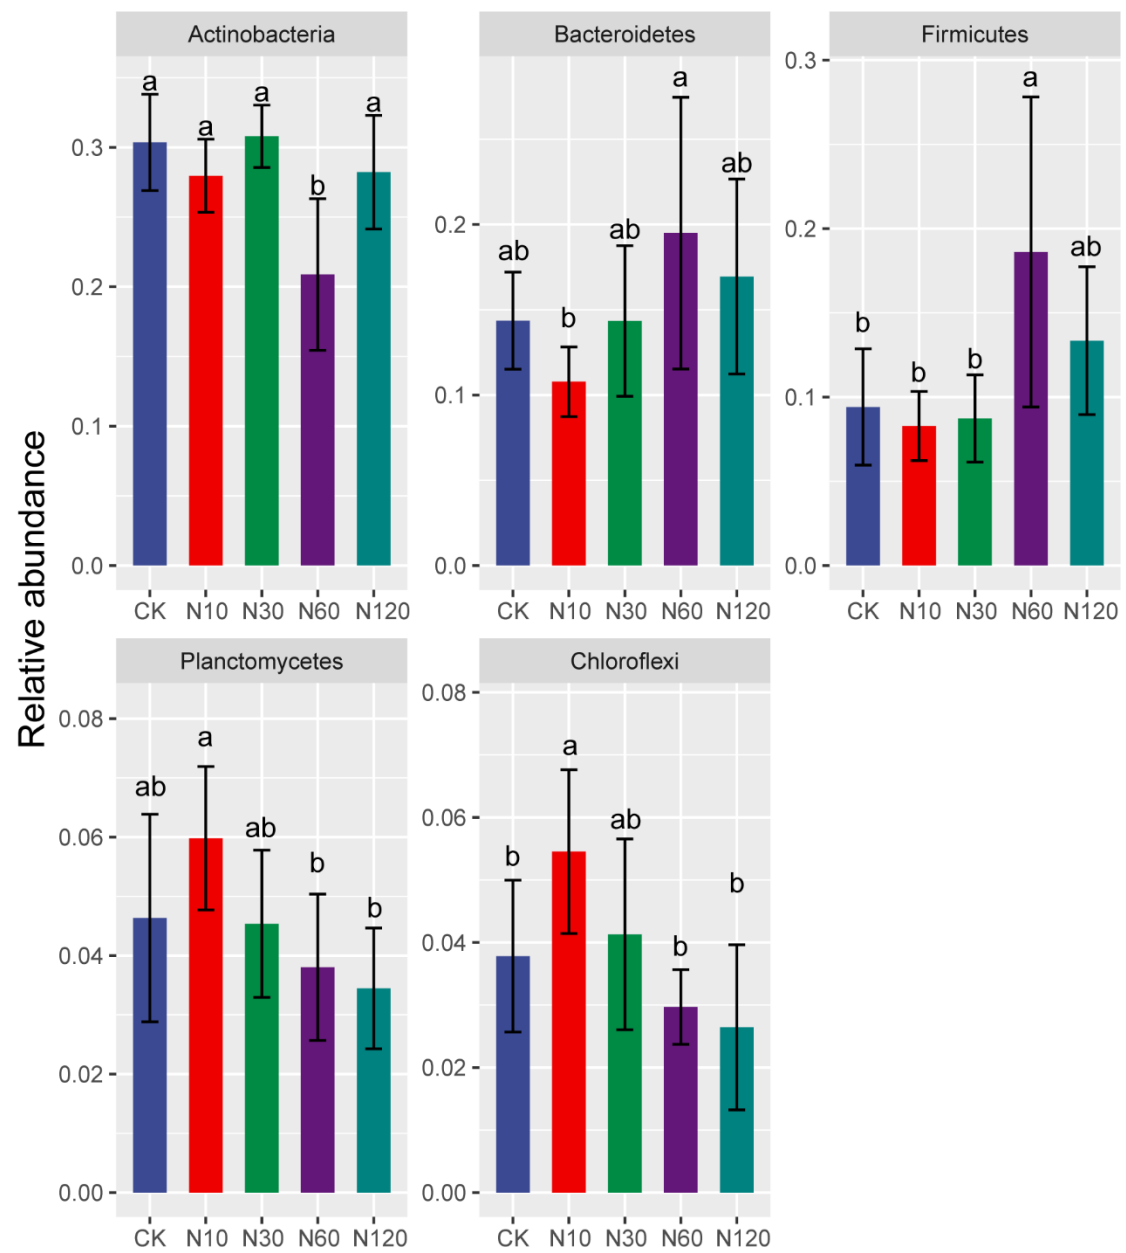

**Fig. S2** Phyla significantly affected by N treatment ( $P < 0.05$ ). Different lowercase letters indicate a significant difference among different N addition treatments.

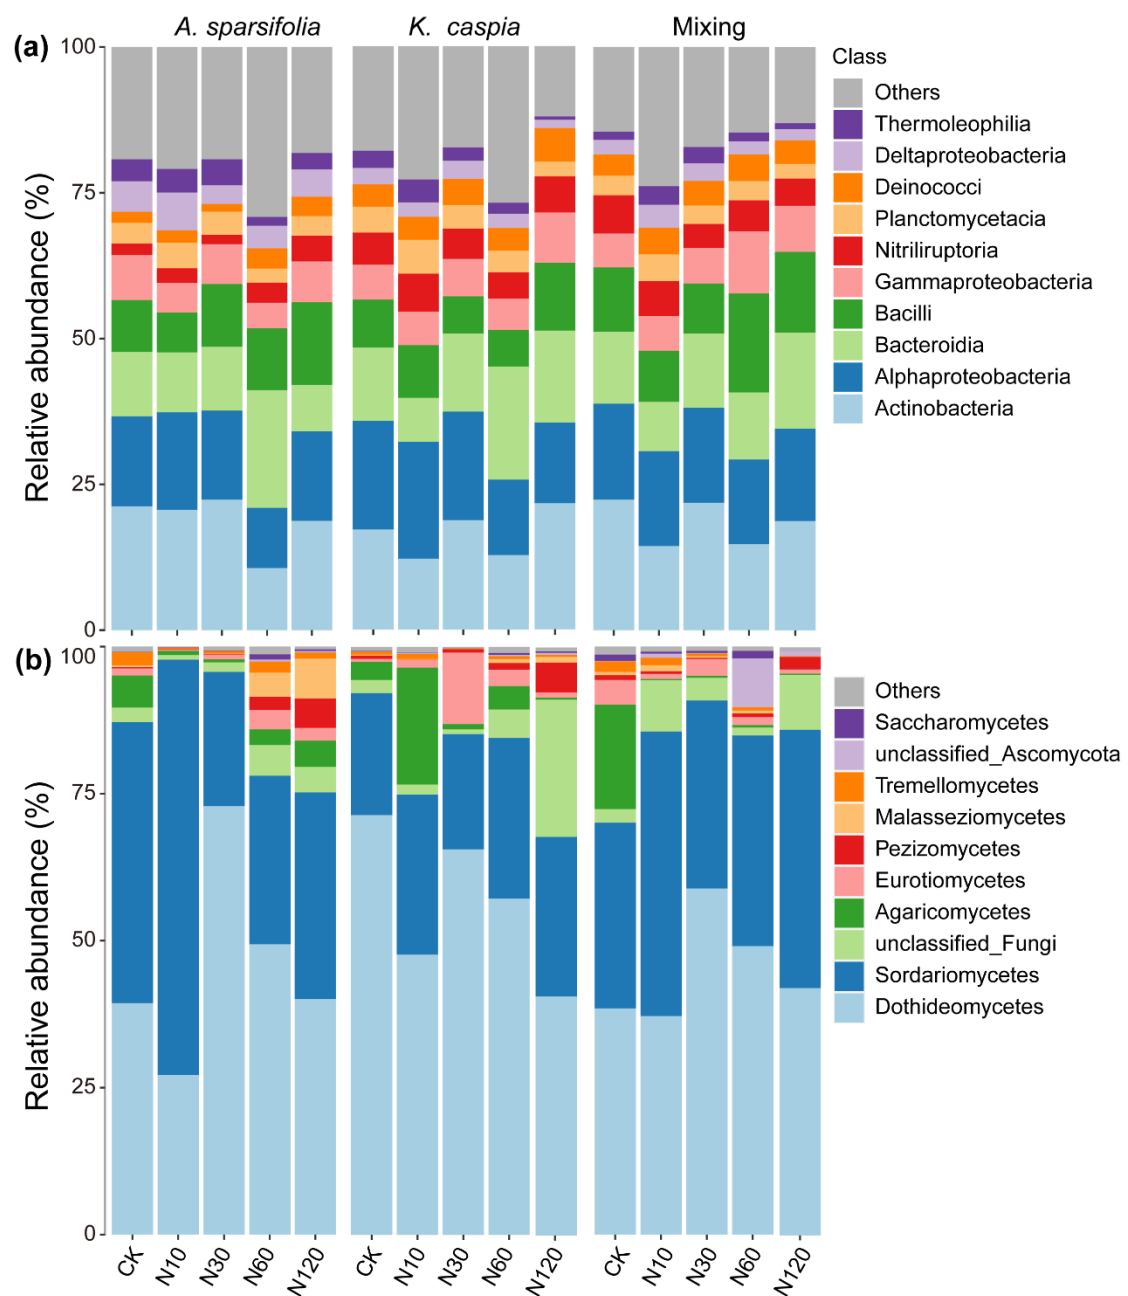

**Fig. S3** Community composition of bacteria **(a)** and fungi **(b)** at class level (top 10).

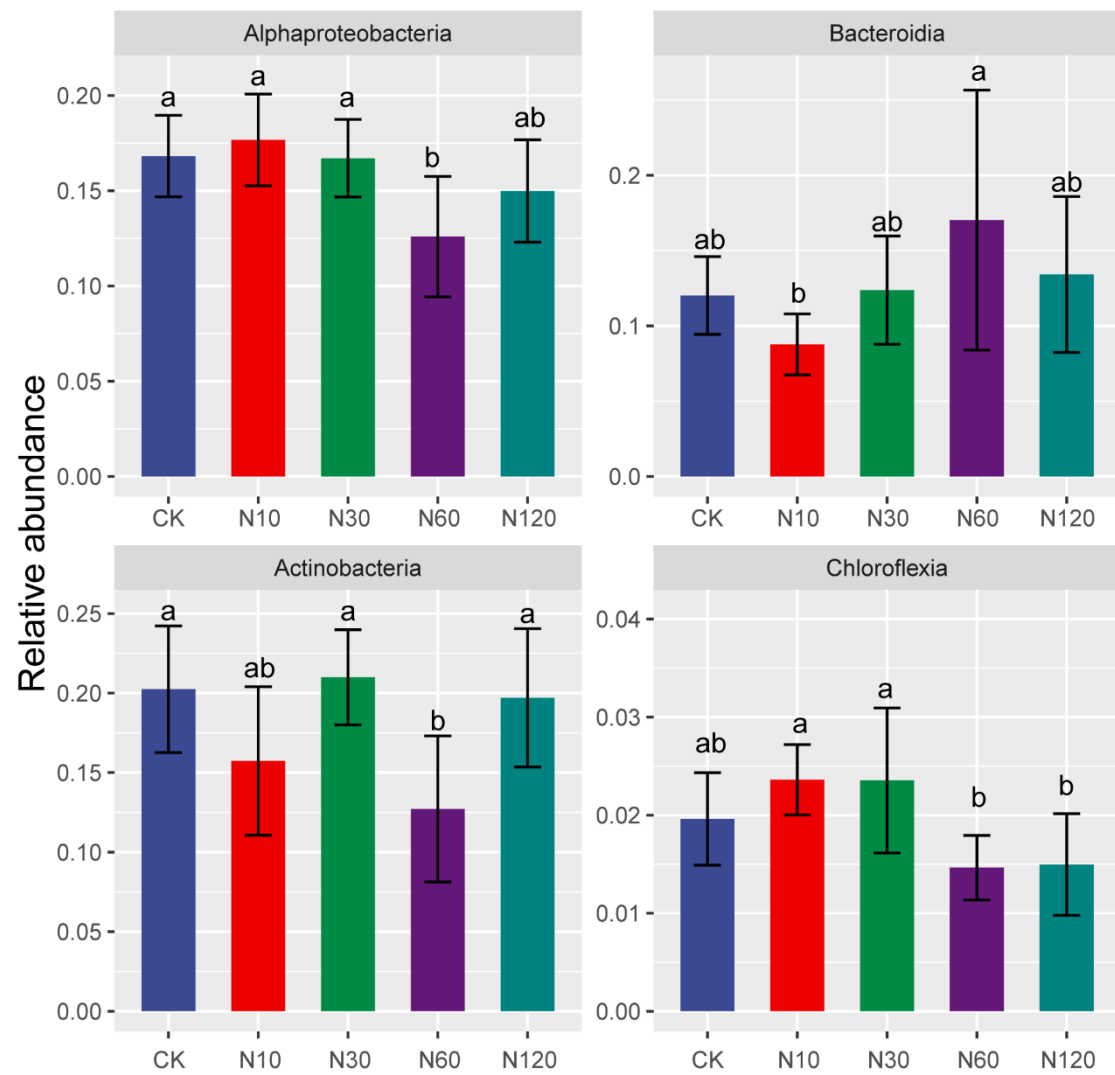

**Fig. S4** The classes significantly affected by N treatment ( $P < 0.05$ ). Different lowercase letters indicate a significant difference among different N addition treatments.

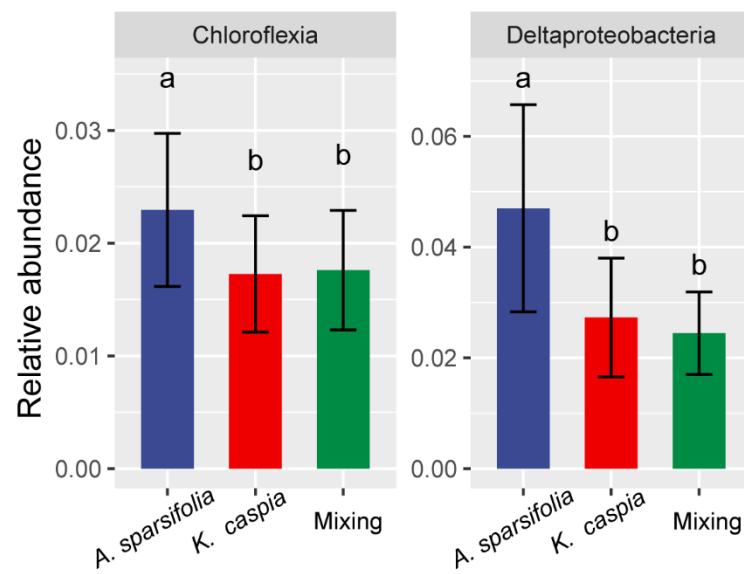

**Fig. S5** The classes significantly affected by plant community type ( $P < 0.05$ ). Different lowercase letters indicate a significant difference among different N addition treatments.

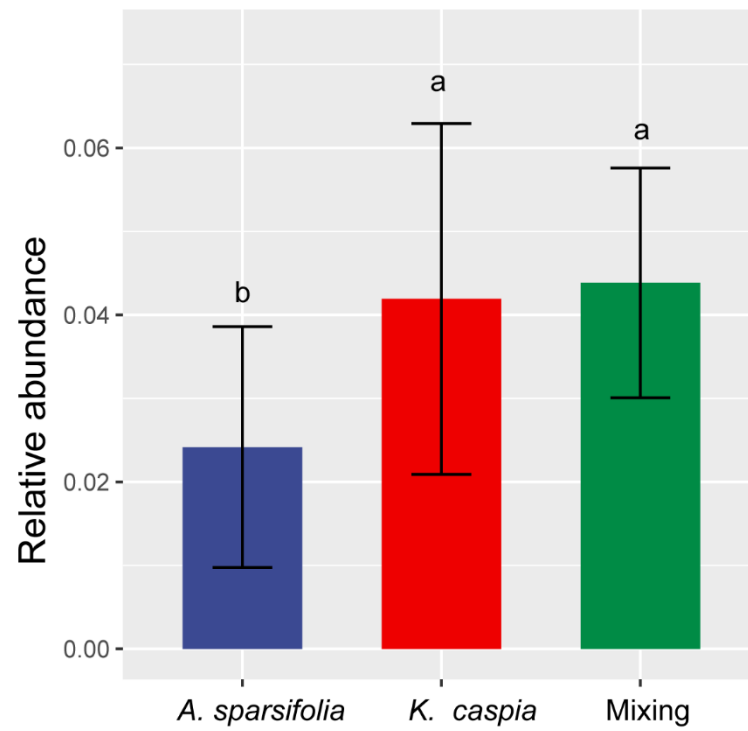

**Fig. S6** The relative abundance of Deinococcus-Thermus. Different lowercase letters indicate a significant difference among different plant communities.



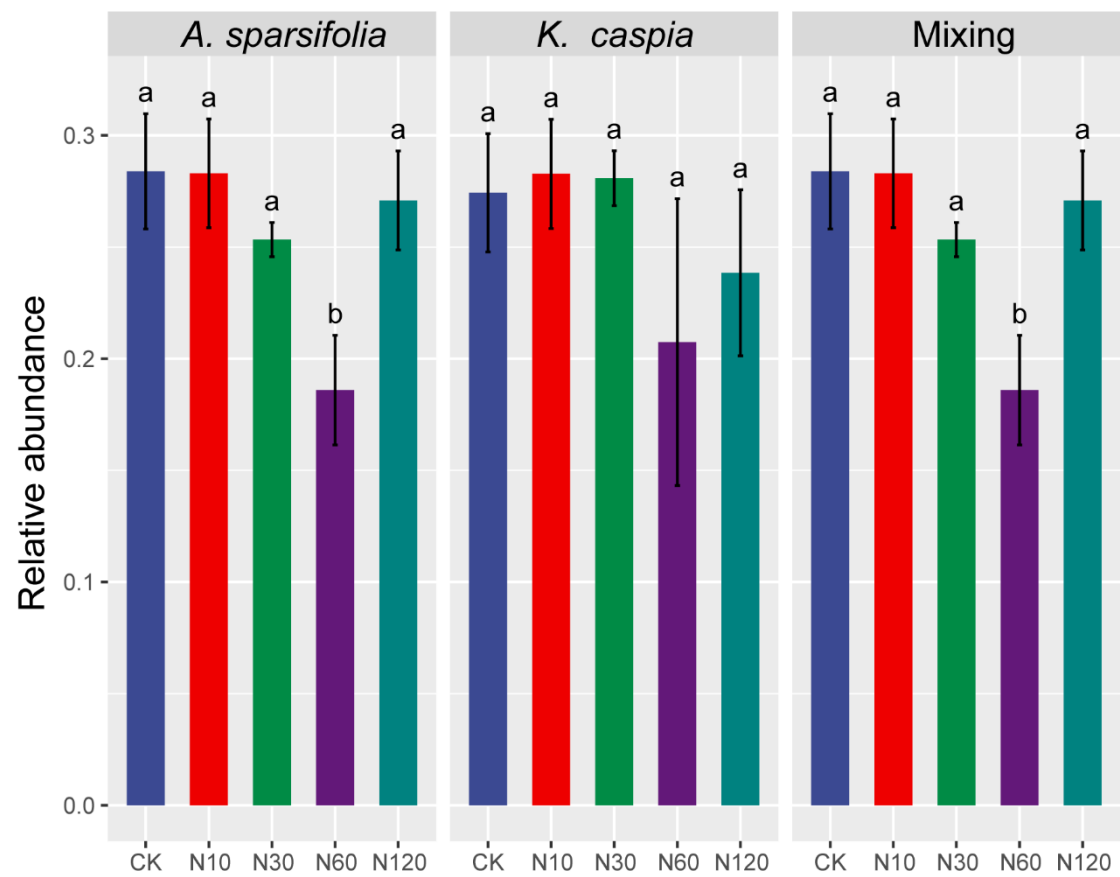

**Fig. S7** The relative abundance of Proteobacteria. Different lowercase letters indicate a significant difference among different plant communities.

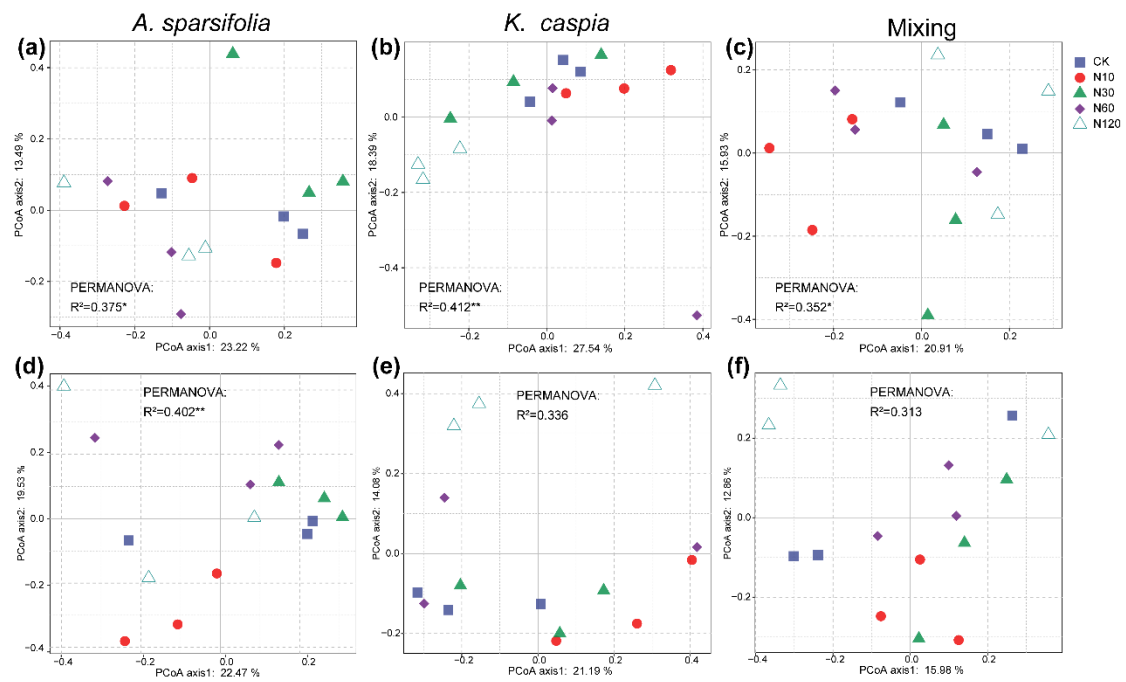

**Figure S8** Principal coordinate analysis (PCoA) of the bacterial (a, b, c) and fungal (d, e, f) communities based on the Bray-Curtis distance of ASV. Permutational analysis of variance (PERMANOVA) shows the effects of N addition treatment on the Bray-Curtis distance of ASVs.

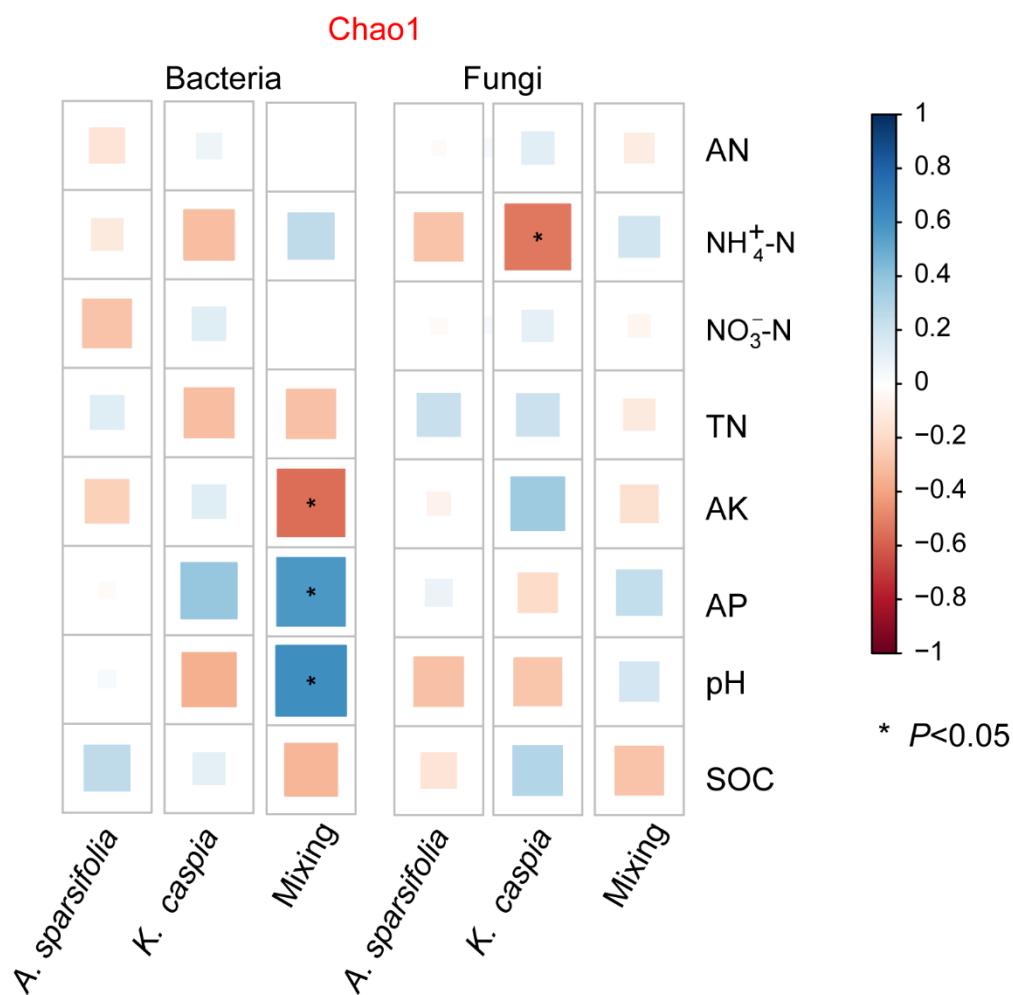

**Figure S9** Pearson correlation between  $\alpha$ -diversity (Chao1) of bacterial **(a)** and fungal **(b)** communities and soil properties. Asterisks indicate significant relationships ( $P < 0.05$ ). SOC, soil organic carbon; AP, available phosphorus; AK, available potassium; TN, total nitrogen; NO<sub>3</sub><sup>-</sup>-N, nitrate; NH<sub>4</sub><sup>+</sup>-N, ammonium; AN, available nitrogen.

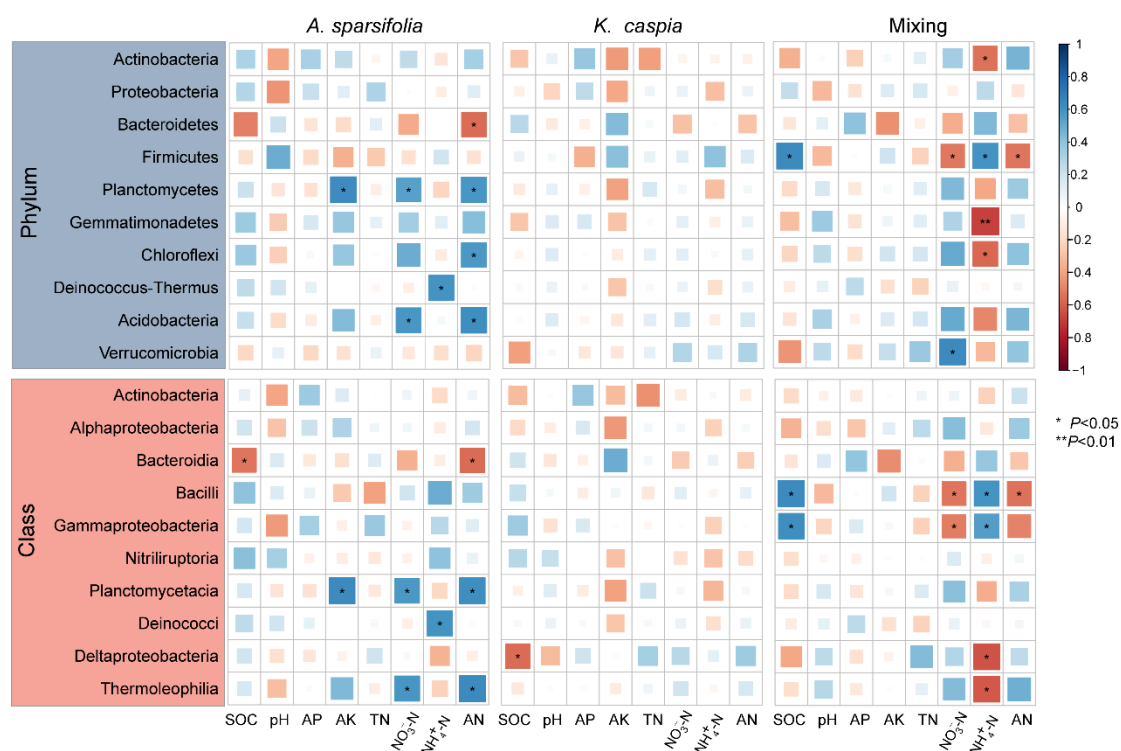

**Fig. S10** Pearson correlation between the relative abundance of bacterial dominant phyla and classes and soil properties. Asterisks indicate significant relationships. SOC, soil organic carbon; AP, available phosphorus; AK, available potassium; TN, total nitrogen; NO<sub>3</sub><sup>-</sup>-N, nitrate; NH<sub>4</sub><sup>+</sup>-N, ammonium; AN, available nitrogen.

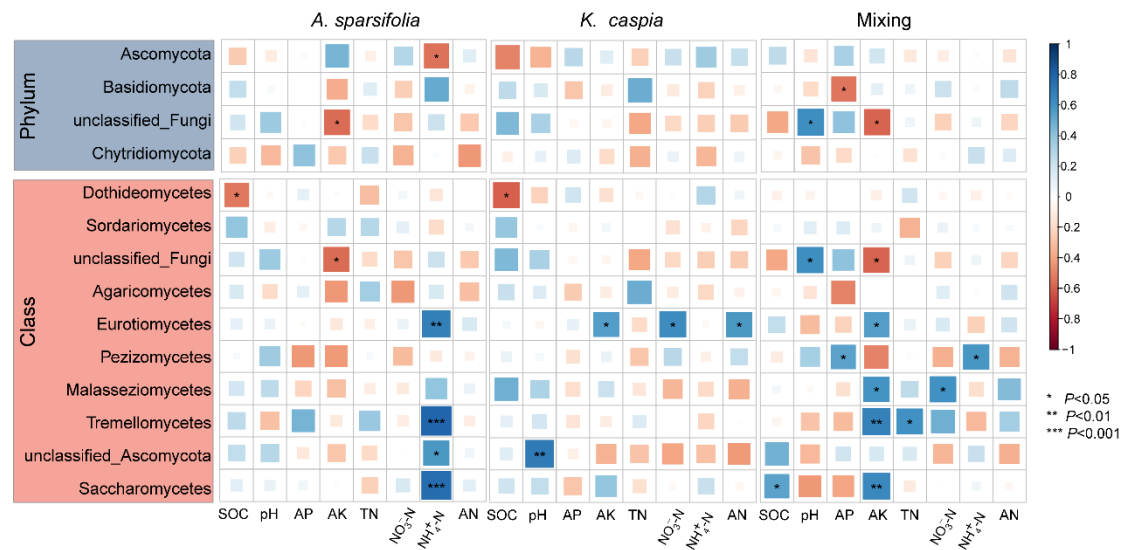

**Figure S11** Pearson correlation between the relative abundance of fungal dominant phyla and classes and soil properties. Asterisks indicate significant relationships. SOC, soil organic carbon; AP, available phosphorus; AK, available potassium; TN, total nitrogen;  $\text{NO}_3^- \text{--N}$ , nitrate;  $\text{NH}_4^+ \text{--N}$ , ammonium; AN, available nitrogen.
